# Supplementary material for: Difference in the Vitreal Protein Profiles of Patients with Proliferative Diabetic Retinopathy with and without Intravitreal Conbercept Injection
Source: Hindawi journal article supplement (doi:10.1155/2018/7397610), 2018-01-01
Supplement: f1 [file 7397610.f1.pdf]

---

# **Difference in the Vitreal Protein Profiles of Patients with Proliferative Diabetic Retinopathy with and without Intravitreal Conbercept Injection**

**Chen Zou<sup>1</sup>, Minjie Zhao<sup>2</sup>, Jingjing Yu<sup>3</sup>, Dandan Zhu<sup>1</sup>, Yunzhi Wang<sup>1</sup>,  
Xinping She<sup>1</sup>, Yanan Hu<sup>1</sup> & Zhi Zheng<sup>1</sup>.**

1. Department of Ophthalmology, Shanghai First People's Hospital, School of Medicine, Shanghai Jiao Tong University, No. 100 Haining Road, Shanghai 200080, China.

2. Department of Ophthalmology, Yixing People's Hospital, Jiangsu University, No.75 Tongzhenguan Road, Yixing, Jiangsu, 214200, China.

3. Department of Ophthalmology, Changshu the 2nd People's Hospital, Changshu, Jiangsu, 215500, China.

First author's E-mail: [chenzou0814@foxmail.com](mailto:chenzou0814@foxmail.com)

Corresponding author: Zhi Zheng. E-mail: [zzheng88@sjtu.edu.cn](mailto:zzheng88@sjtu.edu.cn)

## **Supplementary methods**

### **LC-MS/MS analysis**

A C18 column (100  $\mu$ m ID, 15 cm length) packed with Aqua C18 reverse phase material (Phenomenex) was placed inline with a PROXEON EASY-nLC1000 liquid chromatography system (ThermoFisher, San Jose, CA). Mobile phases A and B were 0.1% formic acid in water and 0.1% formic acid in acetonitrile, respectively. After loading, the digested peptides were separated using the following gradient: 0–5 min, 0–3% B; 5–150 min, 3–30% B; 150–166 min, 30–100% B; 166–180 min, 100% B. The flow rate was set to 300 nL/min. Peptides eluted from the LC column were directly electrosprayed into an Orbitrap Elite mass spectrometer (ThermoFisher, San Jose, CA) with the application of a distal 1.8 kV spray voltage. A cycle of 1 full-scan MS spectrum ( $m/z$  300–1800) was acquired followed by 20 data-dependent MS scans, sequentially generated for the 20 most intense ions in the full MS spectrum at a 30% normalized collision energy. The number of microscans for both MS and MS/MS scans was one and the maximum ion injection times were 200 and 50 ms, respectively. The dynamic exclusion duration was 60 s. MS scan functions and HPLC solvent gradients were controlled by the Xcalibur data system (ThermoFisher).

### **Data Analysis**

Protein analysis was performed using the Integrated Proteomics Pipeline, IP2 (Integrated Proteomics Applications, Inc., San Diego, CA). MS/MS spectra

were extracted from raw files using RawXtract 1.9.9.1 (<http://fields.scripps.edu/downloads.php>), and were searched with the ProLuCID algorithm against the Uniprot human database (<http://www.uniprot.org/>) within IP2 (MS1: 7ppm, MS2: 0.05 Da). To accurately estimate peptide probabilities and false discovery rates, we used a decoy database containing the reverse sequences of all proteins appended to the target database. The search space included all fully tryptic and half-tryptic peptide candidates that fell within the mass tolerance window. Carbamidomethylation (+57.02146 Da) of cysteine was considered a static modification. The database search results were assembled and filtered using the DTASelect program. Normalized spectral abundance factor (NSAF) was used to evaluate the relative protein contents base on the spectrum counts. The protein detected in less than 50% of the sample was defined to undetected protein.

**supplementary table S1: 204 proteins identified only in PDR group**

| <b>Uniprot ID</b> | <b>sequence<br/>coverage(%)</b> | <b>sequence<br/>count</b> | <b>n<sup>a</sup></b> | <b>mean NSAF<sup>b</sup></b> |
|-------------------|---------------------------------|---------------------------|----------------------|------------------------------|
| A0A024QZ34        | 12.65                           | 2.50                      | 4                    | 0.00014                      |
| A0A024R2W4        | 5.11                            | 2.80                      | 4                    | 0.00011                      |
| A0A024R3X4        | 5.44                            | 2.00                      | 6                    | 0.00011                      |
| A0A024R433        | 15.68                           | 2.82                      | 6                    | 0.00060                      |
| A0A024RDK2        | 1.25                            | 2.00                      | 4                    | 0.00001                      |
| A0A087WTE4        | 6.40                            | 3.55                      | 4                    | 0.00006                      |
| A0A087WTF6        | 5.76                            | 3.55                      | 4                    | 0.00006                      |
| A0A087WU91        | 17.50                           | 2.00                      | 4                    | 0.00070                      |
| A0A087WV75        | 7.49                            | 5.31                      | 4                    | 0.00005                      |
| A0A087WWD4        | 7.49                            | 5.31                      | 4                    | 0.00005                      |
| A0A087WX77        | 7.71                            | 5.31                      | 4                    | 0.00006                      |
| A0A097PIG2        | 32.76                           | 7.40                      | 4                    | 0.00701                      |
| A0A097PIJ4        | 32.76                           | 7.40                      | 4                    | 0.00701                      |
| A0A097PIJ6        | 53.05                           | 11.00                     | 4                    | 0.00457                      |
| A0A097PIJ9        | 32.58                           | 7.40                      | 4                    | 0.00698                      |
| A0A0A0MQX7        | 26.72                           | 8.50                      | 4                    | 0.00028                      |
| A0A0A0MRA3        | 0.22                            | 3.40                      | 4                    | 0.00000                      |
| A0A0A0MRG2        | 7.66                            | 4.17                      | 6                    | 0.00017                      |
| A0A0A0MS15        | 16.80                           | 2.00                      | 4                    | 0.00067                      |
| A0A0A0MTS7        | 0.15                            | 2.96                      | 4                    | 0.00000                      |
| A0A0B4J1T9        | 31.02                           | 3.44                      | 4                    | 0.00121                      |
| A0A0B4J1V6        | 15.95                           | 2.09                      | 4                    | 0.00050                      |
| A0A0B4J1Z4        | 21.79                           | 2.15                      | 6                    | 0.00061                      |
| A0A0B4J259        | 12.78                           | 2.00                      | 4                    | 0.00029                      |
| A0A0C4DGL8        | 13.63                           | 4.50                      | 4                    | 0.00048                      |
| A0A0F7TAV4        | 32.68                           | 2.94                      | 4                    | 0.00117                      |
| A0A0G2JIE7        | 16.25                           | 5.80                      | 4                    | 0.00047                      |
| A0A0G2JL69        | 16.03                           | 9.10                      | 6                    | 0.00045                      |
| A0A0H3W5J2        | 57.64                           | 16.20                     | 4                    | 0.00911                      |
| A0M8Q6            | 54.87                           | 5.83                      | 6                    | 0.00692                      |
| A0N5G3            | 37.59                           | 4.22                      | 4                    | 0.00223                      |
| A2J1N8            | 18.90                           | 2.00                      | 4                    | 0.00063                      |
| A2J422            | 7.00                            | 2.00                      | 4                    | 0.00400                      |
| A2J423            | 7.37                            | 2.00                      | 4                    | 0.00408                      |
| A2KBB9            | 29.14                           | 5.24                      | 4                    | 0.00060                      |
| A2KBC0            | 29.14                           | 5.24                      | 4                    | 0.00060                      |
| A2KBC2            | 29.14                           | 5.24                      | 4                    | 0.00060                      |
| A2KBC3            | 29.14                           | 5.24                      | 4                    | 0.00060                      |
| A2KBC4            | 29.73                           | 5.61                      | 4                    | 0.00060                      |
| A2KBC5            | 29.14                           | 5.24                      | 4                    | 0.00060                      |
| A2KBC7            | 29.14                           | 5.24                      | 4                    | 0.00060                      |
| A2KBC8            | 29.14                           | 5.24                      | 4                    | 0.00060                      |
| A2KUC4            | 13.91                           | 2.43                      | 4                    | 0.00097                      |
| A2MYE1            | 29.42                           | 2.31                      | 6                    | 0.00074                      |
| A2MYE2            | 29.42                           | 2.31                      | 6                    | 0.00074                      |
| A2NB45            | 32.70                           | 3.30                      | 8                    | 0.00157                      |
| A4UGR9            | 1.53                            | 2.50                      | 4                    | 0.00002                      |
| A5YM51            | 3.30                            | 2.00                      | 4                    | 0.00005                      |
| A6XMH4            | 28.40                           | 4.27                      | 6                    | 0.00094                      |

|        |       |        |   |         |
|--------|-------|--------|---|---------|
| A8K2I0 | 18.59 | 11.82  | 4 | 0.00123 |
| A8K3L0 | 24.77 | 13.50  | 4 | 0.00046 |
| A8K5T0 | 30.16 | 27.56  | 6 | 0.00063 |
| A8K7Q1 | 11.63 | 4.47   | 4 | 0.00013 |
| A8K9M5 | 8.97  | 3.80   | 6 | 0.00019 |
| B0YJC4 | 7.63  | 3.18   | 6 | 0.00015 |
| B0ZBE2 | 27.43 | 9.61   | 6 | 0.00063 |
| B1AHL2 | 15.94 | 7.63   | 6 | 0.00022 |
| B2R4C5 | 23.80 | 2.85   | 6 | 0.00036 |
| B2R6W1 | 15.93 | 8.95   | 8 | 0.00048 |
| B2R9F2 | 17.85 | 5.29   | 4 | 0.00024 |
| B2RCU8 | 10.82 | 2.38   | 4 | 0.00015 |
| B3GQS7 | 4.40  | 2.00   | 6 | 0.00011 |
| B3KRK8 | 8.08  | 3.18   | 6 | 0.00016 |
| B3KS70 | 59.38 | 13.12  | 4 | 0.00154 |
| B4DID6 | 44.12 | 11.81  | 4 | 0.00217 |
| B4DJT9 | 7.66  | 4.17   | 6 | 0.00017 |
| B4DMX2 | 7.33  | 3.00   | 4 | 0.00019 |
| B4DPR2 | 83.94 | 111.50 | 6 | 0.06588 |
| B4DQM1 | 7.42  | 4.17   | 6 | 0.00016 |
| B4DR57 | 51.03 | 8.25   | 4 | 0.00131 |
| B4DRB7 | 7.10  | 3.54   | 4 | 0.00009 |
| B4DRF2 | 22.76 | 13.00  | 4 | 0.00045 |
| B4DRR0 | 22.22 | 13.83  | 4 | 0.00130 |
| B4DSV9 | 3.13  | 2.57   | 4 | 0.00011 |
| B4DV48 | 16.03 | 9.10   | 6 | 0.00045 |
| B4DZ36 | 3.54  | 3.00   | 4 | 0.00013 |
| B4DZX0 | 8.86  | 3.20   | 4 | 0.00014 |
| B4E1B3 | 28.56 | 9.61   | 6 | 0.00065 |
| B6EDE2 | 18.03 | 2.00   | 4 | 0.00046 |
| B6V6K7 | 13.35 | 3.86   | 4 | 0.00017 |
| B7Z1F8 | 47.34 | 15.07  | 4 | 0.00128 |
| B7Z4F6 | 4.50  | 2.00   | 6 | 0.00012 |
| B7Z544 | 28.44 | 21.00  | 4 | 0.00081 |
| B7Z597 | 5.46  | 2.00   | 6 | 0.00012 |
| B7Z5E7 | 5.96  | 2.00   | 6 | 0.00013 |
| C9J0D1 | 24.32 | 2.00   | 6 | 0.00065 |
| C9JC84 | 20.21 | 7.80   | 4 | 0.00075 |
| C9JEU5 | 20.94 | 7.80   | 4 | 0.00077 |
| C9JV77 | 42.95 | 12.57  | 4 | 0.00194 |
| D3DP13 | 32.36 | 7.86   | 4 | 0.00137 |
| D3DSM4 | 3.42  | 2.94   | 6 | 0.00006 |
| D3DSM5 | 3.02  | 2.94   | 6 | 0.00005 |
| E7ETN3 | 32.18 | 36.88  | 4 | 0.00103 |
| E9PBC5 | 7.33  | 3.00   | 4 | 0.00019 |
| E9PR44 | 51.88 | 11.50  | 6 | 0.01400 |
| F5GY80 | 10.00 | 3.80   | 6 | 0.00021 |
| F5H5G1 | 12.69 | 2.38   | 4 | 0.00017 |
| F5H7G1 | 9.83  | 3.80   | 6 | 0.00021 |
| F8VV32 | 16.83 | 2.00   | 4 | 0.00038 |
| G3GAU4 | 20.60 | 2.00   | 4 | 0.00186 |
| G5E968 | 11.05 | 2.00   | 4 | 0.00033 |

|        |       |       |   |         |
|--------|-------|-------|---|---------|
| H0Y300 | 27.58 | 12.88 | 4 | 0.00038 |
| H0Y3H6 | 16.20 | 5.80  | 4 | 0.00047 |
| H0Y897 | 2.89  | 2.57  | 4 | 0.00010 |
| H3BLU2 | 10.58 | 2.38  | 4 | 0.00014 |
| H6VRF9 | 25.64 | 16.73 | 4 | 0.00032 |
| H6VRG3 | 15.08 | 8.27  | 4 | 0.00032 |
| H7BXV5 | 4.22  | 2.40  | 6 | 0.00011 |
| H7BYX6 | 6.70  | 3.55  | 4 | 0.00007 |
| H7C0V9 | 10.72 | 4.67  | 4 | 0.00014 |
| I0B0K5 | 2.23  | 2.00  | 4 | 0.00002 |
| I0B0K6 | 2.08  | 2.00  | 4 | 0.00002 |
| I0B0K7 | 1.98  | 2.00  | 4 | 0.00001 |
| I0B0K8 | 1.30  | 2.00  | 4 | 0.00001 |
| I6L894 | 1.25  | 2.00  | 4 | 0.00001 |
| J3QLC9 | 18.63 | 5.75  | 4 | 0.00046 |
| J3QR68 | 30.16 | 12.88 | 4 | 0.00042 |
| K7ERE3 | 8.30  | 3.00  | 4 | 0.00019 |
| K7ES70 | 12.58 | 2.50  | 4 | 0.00014 |
| P00918 | 39.91 | 9.17  | 4 | 0.00054 |
| P01019 | 27.43 | 9.61  | 6 | 0.00063 |
| P01617 | 32.25 | 3.06  | 8 | 0.00157 |
| P02489 | 53.57 | 13.67 | 6 | 0.01211 |
| P02511 | 51.58 | 11.50 | 6 | 0.01392 |
| P02533 | 20.43 | 8.87  | 4 | 0.00107 |
| P02538 | 21.09 | 13.83 | 4 | 0.00123 |
| P02743 | 11.55 | 2.69  | 4 | 0.00044 |
| P04114 | 4.90  | 17.14 | 4 | 0.00005 |
| P04259 | 14.52 | 10.12 | 6 | 0.00084 |
| P05813 | 31.98 | 7.40  | 4 | 0.00685 |
| P06314 | 20.74 | 4.00  | 4 | 0.00086 |
| P06681 | 17.09 | 10.27 | 4 | 0.00054 |
| P08670 | 8.75  | 4.00  | 6 | 0.00014 |
| P08779 | 19.70 | 8.14  | 4 | 0.00075 |
| P0C0S5 | 23.19 | 2.00  | 6 | 0.00062 |
| P10809 | 5.44  | 2.00  | 6 | 0.00011 |
| P12036 | 1.85  | 2.50  | 4 | 0.00007 |
| P12883 | 1.60  | 2.50  | 4 | 0.00005 |
| P13533 | 1.60  | 2.50  | 4 | 0.00005 |
| P13591 | 7.71  | 5.31  | 4 | 0.00006 |
| P13646 | 10.39 | 4.43  | 4 | 0.00017 |
| P20396 | 18.66 | 2.11  | 4 | 0.00041 |
| P20930 | 1.30  | 2.00  | 4 | 0.00001 |
| P22914 | 35.08 | 6.60  | 6 | 0.00741 |
| P24593 | 15.68 | 2.82  | 6 | 0.00060 |
| P32119 | 56.90 | 11.83 | 4 | 0.00131 |
| P36980 | 19.78 | 3.69  | 4 | 0.00033 |
| P39060 | 2.62  | 2.94  | 6 | 0.00004 |
| P48668 | 17.34 | 11.38 | 4 | 0.00119 |
| P53673 | 53.05 | 11.00 | 4 | 0.00457 |
| P53674 | 36.48 | 9.00  | 4 | 0.00651 |
| P55083 | 13.84 | 2.50  | 4 | 0.00015 |
| P61626 | 23.80 | 2.85  | 6 | 0.00036 |

|        |       |       |   |         |
|--------|-------|-------|---|---------|
| P81605 | 27.72 | 3.10  | 4 | 0.00081 |
| Q01484 | 1.25  | 2.00  | 4 | 0.00001 |
| Q02818 | 11.63 | 4.47  | 4 | 0.00013 |
| Q06830 | 34.14 | 5.09  | 4 | 0.00045 |
| Q06AH7 | 80.48 | 95.21 | 6 | 0.01120 |
| Q08629 | 22.95 | 8.50  | 4 | 0.00024 |
| Q0ZCH4 | 43.99 | 4.36  | 4 | 0.00950 |
| Q0ZCH6 | 15.30 | 2.00  | 4 | 0.00061 |
| Q0ZCJ2 | 41.54 | 4.36  | 4 | 0.00897 |
| Q12841 | 14.06 | 3.65  | 4 | 0.00039 |
| Q13449 | 10.82 | 2.38  | 4 | 0.00015 |
| Q14118 | 5.11  | 2.80  | 4 | 0.00011 |
| Q14204 | 1.20  | 2.25  | 4 | 0.00001 |
| Q17R60 | 6.48  | 4.29  | 6 | 0.00014 |
| Q53GX6 | 11.63 | 4.47  | 4 | 0.00013 |
| Q53GY3 | 25.90 | 9.12  | 4 | 0.00070 |
| Q53GZ8 | 16.35 | 9.40  | 4 | 0.00054 |
| Q53HP3 | 16.05 | 9.67  | 6 | 0.00043 |
| Q53HU8 | 8.75  | 4.00  | 6 | 0.00014 |
| Q59EV3 | 1.95  | 2.50  | 4 | 0.00006 |
| Q59FB2 | 10.43 | 3.67  | 4 | 0.00014 |
| Q5JP69 | 15.74 | 9.27  | 6 | 0.00043 |
| Q5NV88 | 38.10 | 3.17  | 4 | 0.00111 |
| Q5SR54 | 12.37 | 7.14  | 4 | 0.00028 |
| Q65ZC8 | 7.00  | 2.00  | 4 | 0.00058 |
| Q6EMK4 | 5.43  | 2.21  | 4 | 0.00006 |
| Q6EZE9 | 23.37 | 2.00  | 4 | 0.00095 |
| Q6N041 | 24.97 | 9.25  | 6 | 0.00118 |
| Q6N095 | 35.74 | 23.78 | 4 | 0.00561 |
| Q6PJF2 | 47.41 | 14.67 | 4 | 0.01096 |
| Q6PJG0 | 41.94 | 11.71 | 4 | 0.00479 |
| Q6S8J3 | 4.40  | 4.14  | 4 | 0.00025 |
| Q6ZW64 | 44.19 | 17.60 | 4 | 0.00176 |
| Q71UI9 | 23.19 | 2.00  | 6 | 0.00062 |
| Q86T07 | 9.20  | 2.00  | 4 | 0.00027 |
| Q86YZ3 | 2.82  | 4.93  | 4 | 0.00007 |
| Q8IZZ5 | 15.28 | 7.09  | 6 | 0.00031 |
| Q8NG19 | 11.09 | 2.40  | 6 | 0.00030 |
| Q8TE63 | 14.23 | 2.60  | 4 | 0.00117 |
| Q96DK0 | 43.63 | 17.22 | 4 | 0.00175 |
| Q99972 | 10.67 | 4.59  | 4 | 0.00012 |
| Q9BU40 | 9.55  | 3.50  | 4 | 0.00013 |
| Q9GZL9 | 82.35 | 18.18 | 4 | 0.00524 |
| Q9UL85 | 26.86 | 2.63  | 6 | 0.00090 |
| S6B286 | 38.26 | 9.00  | 4 | 0.00456 |
| S6BAN6 | 42.42 | 10.40 | 4 | 0.00470 |
| V9HW12 | 56.90 | 11.83 | 4 | 0.00131 |
| V9HW21 | 39.91 | 9.17  | 4 | 0.00054 |
| V9HW27 | 51.58 | 11.50 | 6 | 0.01392 |
| V9HWE1 | 8.75  | 4.00  | 6 | 0.00014 |
| V9HWP0 | 11.55 | 2.69  | 4 | 0.00044 |

a n=sample size

b NSAF=Normalized spectral abundance factor



**supplementary table S2: 86 proteins identified only in IVC group**

| <b>Uniprot ID</b> | <b>sequence<br/>coverage(%)</b> | <b>sequence<br/>count</b> | <b>n<sup>a</sup></b> | <b>mean NSAF<sup>b</sup></b> |
|-------------------|---------------------------------|---------------------------|----------------------|------------------------------|
| P01042            | 32.16                           | 20.72                     | 5                    | 0.001370864                  |
| A0A0A0MS11        | 19.00                           | 2.00                      | 5                    | 0.000637962                  |
| A0A0B4J1V5        | 16.68                           | 2.10                      | 5                    | 0.000619388                  |
| A2J1M2            | 18.40                           | 2.00                      | 5                    | 0.000739473                  |
| A2J1M3            | 20.36                           | 2.10                      | 5                    | 0.000754879                  |
| A2JA19            | 22.53                           | 2.33                      | 5                    | 0.000442968                  |
| B4DNT5            | 11.56                           | 2.90                      | 5                    | 0.000342119                  |
| B4DVE1            | 14.58                           | 7.22                      | 5                    | 0.000259104                  |
| B4E1C2            | 32.16                           | 20.72                     | 5                    | 0.001370864                  |
| B4E1E1            | 14.97                           | 6.00                      | 5                    | 0.000227741                  |
| Q5CZ94            | 38.99                           | 10.70                     | 5                    | 0.002171826                  |
| Q5NV90            | 35.34                           | 3.69                      | 5                    | 0.001705882                  |
| Q6PIK1            | 41.71                           | 11.25                     | 5                    | 0.00284313                   |
| Q8N5F4            | 42.76                           | 10.71                     | 5                    | 0.004629495                  |
| Q8NCL6            | 44.54                           | 17.14                     | 5                    | 0.001932507                  |
| Q9UL86            | 46.14                           | 4.29                      | 5                    | 0.000735982                  |
| Q9UNU2            | 52.94                           | 15.40                     | 5                    | 0.001143534                  |
| S6B2A6            | 22.54                           | 8.30                      | 5                    | 0.001770215                  |
| U5LGU2            | 10.90                           | 2.90                      | 5                    | 0.000323437                  |
| U5LGW0            | 10.90                           | 2.90                      | 5                    | 0.000323437                  |
| U5LH96            | 10.90                           | 2.90                      | 5                    | 0.000323437                  |
| U5LI90            | 10.90                           | 2.90                      | 5                    | 0.000323437                  |
| U5LIC5            | 10.90                           | 2.90                      | 5                    | 0.000323437                  |
| U5LIG7            | 10.90                           | 2.90                      | 5                    | 0.000323437                  |
| U5LIH6            | 10.90                           | 2.90                      | 5                    | 0.000323437                  |
| U5LII8            | 10.90                           | 2.90                      | 5                    | 0.000323437                  |
| U5LKC6            | 10.90                           | 2.90                      | 5                    | 0.000323437                  |
| U5LKG0            | 10.90                           | 2.90                      | 5                    | 0.000323437                  |
| U5LKM6            | 10.90                           | 2.90                      | 5                    | 0.000323437                  |
| U6A3P2            | 99.73                           | 9.78                      | 5                    | 0.021600361                  |
| O75326            | 16.95                           | 9.67                      | 5                    | 0.000374211                  |
| Q08380            | 14.27                           | 7.22                      | 5                    | 0.000253789                  |
| Q4G0P3            | 0.73                            | 2.50                      | 5                    | 1.91391E-05                  |
| P00915            | 51.66                           | 12.92                     | 6                    | 0.001320625                  |
| Q09666            | 0.82                            | 2.56                      | 6                    | 1.16306E-05                  |
| P01598            | 28.24                           | 2.65                      | 6                    | 0.000766631                  |
| P01700            | 19.00                           | 2.92                      | 6                    | 0.000708331                  |
| A0A024R1G8        | 8.49                            | 3.00                      | 6                    | 0.000216953                  |
| A0A024R1Q4        | 8.82                            | 3.00                      | 6                    | 0.000225674                  |
| A0A075B6N7        | 43.77                           | 10.86                     | 6                    | 0.001767259                  |
| A5PL32            | 7.98                            | 3.00                      | 6                    | 0.000204598                  |
| B2R9E5            | 8.49                            | 3.00                      | 6                    | 0.000216953                  |
| B3KUE5            | 7.31                            | 2.38                      | 6                    | 8.24437E-05                  |
| B3KXC3            | 11.03                           | 2.23                      | 6                    | 0.000245187                  |
| O14791            | 8.82                            | 3.00                      | 6                    | 0.000225674                  |
| B4E1N5            | 10.35                           | 3.00                      | 6                    | 0.000264951                  |
| B7WNR0            | 85.22                           | 104.77                    | 6                    | 0.061524122                  |
| B7Z539            | 24.41                           | 12.75                     | 6                    | 0.000875543                  |
| E9PKY7            | 17.71                           | 2.23                      | 6                    | 0.00039359                   |

|            |       |       |   |             |
|------------|-------|-------|---|-------------|
| E9PRK8     | 21.34 | 2.23  | 6 | 0.000472308 |
| H0Y789     | 27.31 | 2.50  | 6 | 0.000385302 |
| P17948     | 4.73  | 11.33 | 6 | 0.000284996 |
| L7RSL3     | 4.73  | 11.33 | 6 | 0.000284996 |
| Q1WWL5     | 8.13  | 3.00  | 6 | 0.00020888  |
| Q29RW7     | 8.13  | 3.00  | 6 | 0.00020888  |
| Q2KHQ6     | 8.82  | 3.00  | 6 | 0.000225674 |
| Q53H91     | 7.29  | 2.20  | 6 | 8.57883E-05 |
| Q6NZ44     | 11.03 | 2.23  | 6 | 0.000245187 |
| Q6P2J1     | 39.00 | 9.67  | 6 | 0.00249194  |
| Q6VFQ6     | 98.80 | 7.67  | 6 | 0.008757382 |
| U5LH46     | 12.73 | 3.17  | 6 | 0.000356159 |
| U5LHF6     | 12.73 | 3.17  | 6 | 0.000356159 |
| U5LKR8     | 12.73 | 3.17  | 6 | 0.000356159 |
| V9HWE3     | 51.66 | 12.92 | 6 | 0.001320625 |
| P55058     | 7.60  | 2.38  | 6 | 8.57883E-05 |
| Q8N475     | 11.26 | 8.50  | 6 | 0.000209334 |
| P00739     | 22.98 | 8.67  | 6 | 0.000658368 |
| P02794     | 14.56 | 2.75  | 7 | 0.00028636  |
| P04003     | 21.81 | 9.33  | 7 | 0.000334726 |
| A0A024R525 | 14.56 | 2.75  | 7 | 0.00028636  |
| A0A024RD88 | 5.71  | 10.44 | 7 | 0.001372374 |
| A0A075B6J0 | 35.20 | 2.64  | 7 | 0.000572552 |
| A2J1M8     | 24.71 | 2.36  | 7 | 0.000915726 |
| B4DVQ0     | 15.20 | 4.11  | 7 | 0.000483955 |
| Q5NV69     | 41.50 | 2.64  | 7 | 0.000675611 |
| Q6NS36     | 11.49 | 2.75  | 7 | 0.000225879 |
| Q8TD27     | 15.48 | 2.50  | 7 | 0.0003176   |
| O43866     | 17.65 | 4.50  | 7 | 0.000252825 |
| P35968     | 5.71  | 10.44 | 7 | 0.001372374 |
| A0A087WYR4 | 42.14 | 11.26 | 8 | 0.002879086 |
| Q68CN4     | 33.63 | 15.80 | 8 | 0.003502381 |
| Q8IWM0     | 34.81 | 3.13  | 8 | 0.000884123 |
| S6BGE0     | 29.95 | 10.57 | 8 | 0.004281338 |
| P02745     | 11.95 | 2.39  | 9 | 0.000269131 |
| A0A024RAG6 | 11.95 | 2.39  | 9 | 0.000269131 |
| Q96JD0     | 34.25 | 3.35  | 9 | 0.001572333 |

a n=sample size

b NSAF=Normalized spectral abundance factor

Supplementary table S3: Differentially expressed proteins among the 450 protein detected in both PDR and IVC group

| Supplementary table S3: Differentially expressed proteins among the 450 protein detected in both PDR and IVC group |                                                            |             |          |     |                |         |                   |          |            |          |        |
|--------------------------------------------------------------------------------------------------------------------|------------------------------------------------------------|-------------|----------|-----|----------------|---------|-------------------|----------|------------|----------|--------|
| Uniprot ID                                                                                                         | Protein Name                                               | sequence    | sequence | PDR | n <sup>a</sup> |         | NSAF <sup>b</sup> |          |            | P value  |        |
|                                                                                                                    |                                                            | coverage(%) | count    |     | IVC            | control | PDR               | IVC      | control    |          |        |
| P02652                                                                                                             | Apolipoprotein A-II ( APOA2 )                              | 63.03       | 9.17     | 8   | 8              | 9       | *                 | 0.005264 | 0.004816   | 0.004155 | 0.0465 |
| P02675                                                                                                             | Fibrinogen beta chain ( FGB )                              | 48.27       | 24.04    | 6   | 8              | 7       | *                 | 0.002382 | 0.002974   | 0.001064 | 0.0071 |
| B7Z5Q2                                                                                                             | highly similar to Ceruloplasmin                            | 60.02       | 62.60    | 4   | 5              | 5       |                   | 0.003117 | * 0.002461 | 0.003442 | 0.0086 |
| P15692                                                                                                             | Vascular endothelial growth factor A ( VEGFA )             | 27.80       | 3.00     | 8   | 7              | 8       | *                 | 0.006122 | 0.002493   | 0.002225 | 0.0001 |
| Q6ZVX0                                                                                                             | highly similar to Protein Tro alpha1 H,myeloma             | 36.12       | 14.54    | 8   | 7              | 9       | *                 | 0.002824 | 0.001579   | 0.001538 | 0.0095 |
| V9HWF6                                                                                                             | Alpha-1-acid glycoprotein(AGP)                             | 43.01       | 11.90    | 8   | 8              | 9       | *                 | 0.003785 | 0.002265   | 0.003116 | 0.0027 |
| P59665                                                                                                             | Neutrophil defensin 1(DEFA1)                               | 23.37       | 2.00     | 4   | 5              | 0       | *                 | 0.000953 | 0.000496   | -        | 0.0235 |
| P59666                                                                                                             | Neutrophil defensin 3(DEFA3)                               | 23.37       | 2.00     | 4   | 5              | 0       | *                 | 0.000953 | 0.000496   | -        | 0.0235 |
| Q9UBP4                                                                                                             | Dickkopf-related protein 3(DKK3)                           | 47.55       | 13.56    | 4   | 5              | 9       | *                 | 0.002554 | 0.001352   | 0.001797 | 0.0201 |
| P19652                                                                                                             | Alpha-1-acid glycoprotein 2(AGP2)                          | 37.22       | 8.00     | 8   | 8              | 9       | *                 | 0.002628 | 0.001620   | 0.002348 | 0.0063 |
| Q96IY4                                                                                                             | Carboxypeptidase B2 ( CPB2 )                               | 14.98       | 4.06     | 6   | 5              | 3       | *                 | 0.000225 | 0.000296   | -        | 0.0111 |
| Q6MZV6                                                                                                             | DKFZp686L19235                                             | 37.78       | 15.08    | 8   | 8              | 8       | *                 | 0.001964 | 0.001655   | 0.001670 | 0.0346 |
| P02679                                                                                                             | Fibrinogen gamma chain ( FGG )                             | 42.92       | 20.50    | 8   | 8              | 7       |                   | 0.001594 | * 0.001978 | 0.000863 | 0.0225 |
| A0A0B4J1X5                                                                                                         | Protein IGHV3-74                                           | 18.65       | 2.16     | 6   | 7              | 9       | *                 | 0.005985 | 0.000495   | 0.000677 | 0.0448 |
| Q96K68                                                                                                             | highly similar to Homo sapiens SNC73 protein (SNC73) mF    | 44.02       | 16.62    | 8   | 8              | 9       | *                 | 0.002265 | 0.001986   | 0.001724 | 0.0489 |
| Q9NPP6                                                                                                             | Immunoglobulin heavy chain variant                         | 42.33       | 14.56    | 6   | 7              | 9       | *                 | 0.002494 | 0.002069   | 0.001782 | 0.0115 |
| Q9UL83                                                                                                             | Myosin-reactive immunoglobulin light chain variable region | 38.81       | 3.31     | 8   | 7              | 7       | *                 | 0.001579 | 0.000741   | 0.000947 | 0.0120 |
| Total                                                                                                              |                                                            |             |          |     |                |         |                   |          |            |          | 17     |

a n=valid sample size

b NSAF=normalized spectral abundance factor, which means the relative abundances of protein

\*\*\*=has a statistically significant difference with other groups

"-="not identified by LC-MS/MS
